# Supplementary material
Source: PubMed Central journal article supplement (PMC7289549)

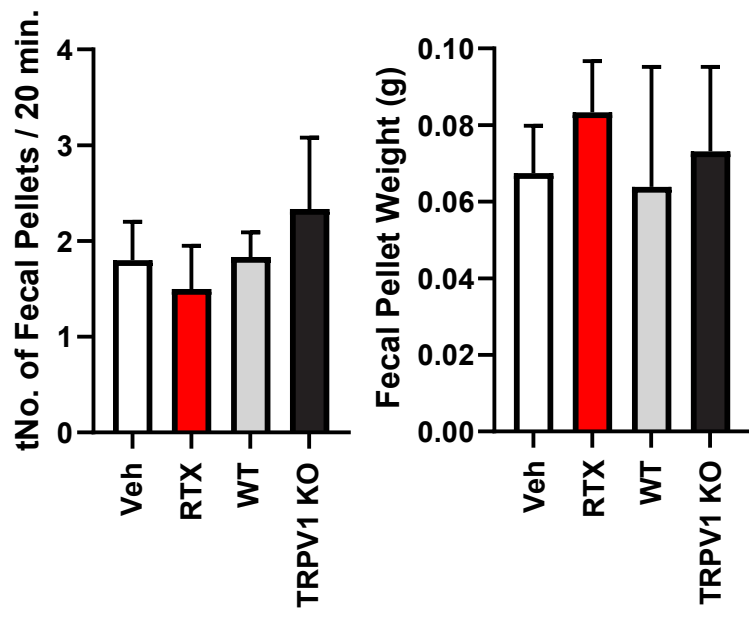

Supplement: jiaa014_suppl_supplementary_figure_1.pdf [file jiaa014_suppl_supplementary_figure_1.pdf]
